# Supplementary material
Source: Springer Nature journal article supplement (https://www.springermedizin.de/resource/supplementary/12936_2013_3177_MOESM1_ESM.pdf/9545236)

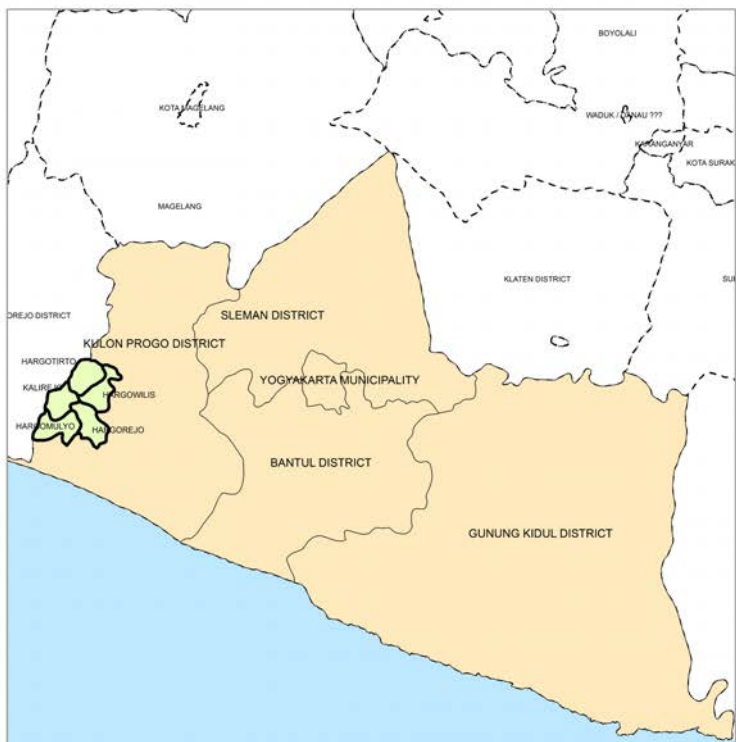

## Legend

— District Boundary

— Village Boundary

■ Kokap Sub District

■ Yogyakarta Province

0 4.75 9.5 19 Kilometers

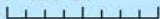

*Indonesia Ocean*

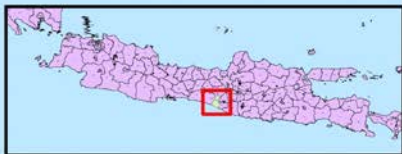

Supplement: MOESM1 [file 9545236]
